# Supplementary material for: Inland Deforestation Organizes Convective Extremes.
Source: Research Square preprint supplement (doi:10.21203/rs.3.rs-7951224/v1), 2025-11-17
Supplement: Supplementary file 1 [file 9adb2f5da1da17dcf134cbbc.pdf]

## 721 Appendix S1 Supplementary information

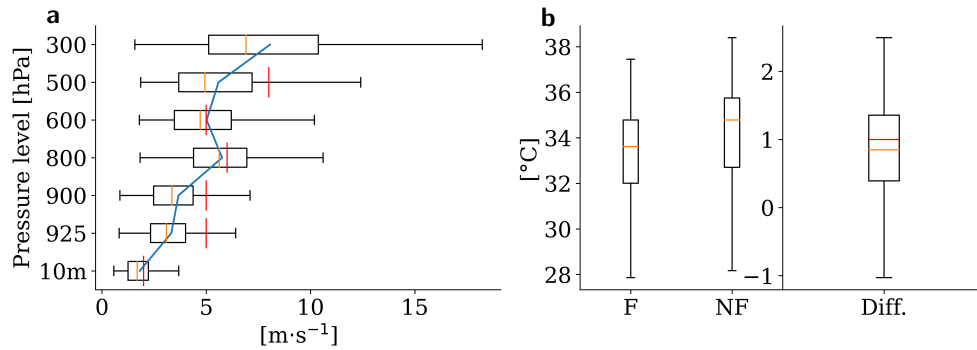

**Figure S1.** **a**, Box and whisker diagrams of ERA-5 wind in  $\text{m s}^{-1}$  over the Rondônia domain denoting the 10, 25, 75 and 90th percentiles for the August-October 2019 -2022 period. Yellow bars denote the median and blue curve denotes the average. **b**, Same as **a** but for skin temperature in  $^{\circ}\text{C}$ . Left panels shows average skin temperature at 11:00LT between the forest (F) and non-forest (NF; boundary region excluded) and the panel on the right shows their difference. Red bars denote the conditioning thresholds.

**Table S1:** WRFV4.2 Configuration

| Grids                   | HE0.5                                                          | HE1                       | HE2                       | HP2                       | HE5                       | HE10                     |
|-------------------------|----------------------------------------------------------------|---------------------------|---------------------------|---------------------------|---------------------------|--------------------------|
| $dx, dy (nx \times ny)$ | 0.5km<br>(1200 $\times$ 1200)                                  | 1km<br>(600 $\times$ 600) | 2km<br>(300 $\times$ 300) | 2km<br>(300 $\times$ 300) | 5km<br>(120 $\times$ 120) | 10km<br>(60 $\times$ 60) |
| $dt$                    | 3s                                                             | 5s                        | 10s                       | 10s                       | 20s                       | 20s                      |
| Turbulence              | 1.5OTKE                                                        | YSU                       | YSU                       | YSU                       | YSU                       | YSU                      |
| Convection scheme       | -                                                              | -                         | -                         | KF [69]                   | -                         | -                        |
| $dz$                    | 50-16000m (nz = 40)                                            |                           |                           |                           |                           |                          |
| Microphysics            | Single-Moment 6-Class Microphysics [67]                        |                           |                           |                           |                           |                          |
| Land surface            | Noah Land Surface Model [75]                                   |                           |                           |                           |                           |                          |
| Radiation               | Rapid Radiative Transfer Model (RRTMG; [76])                   |                           |                           |                           |                           |                          |
| Thermal forcing         | Sunrise: 6:00 LST, solar maximum: 12:00 LST, sunset: 18:00 LST |                           |                           |                           |                           |                          |
| Bowen ratio ( $\beta$ ) | 'Dry' patch: 1.55, 'Wet' patch: 0.45                           |                           |                           |                           |                           |                          |

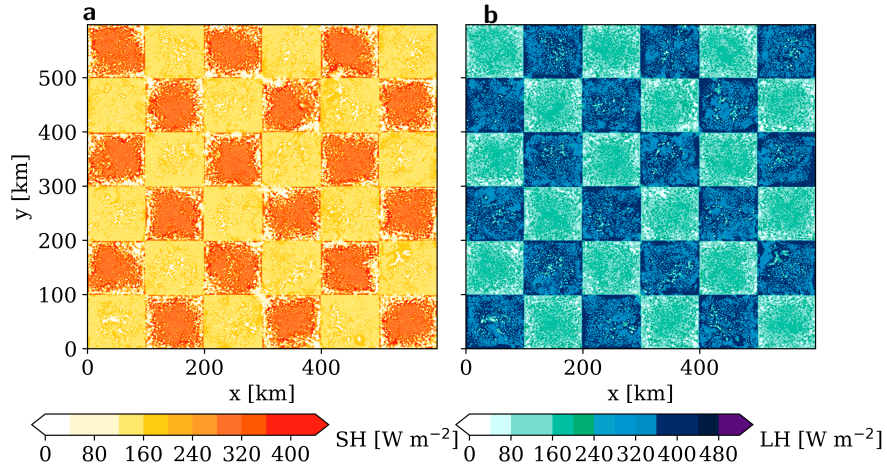

**Figure S2. Response of surface heat fluxes to the imposed checkerboard pattern of wet/dry soil moisture states.** Sensible **a**, and latent heat flux **b**, in  $\text{W m}^{-2}$  for the full domain of the HE1 simulation at 11:00 LT.

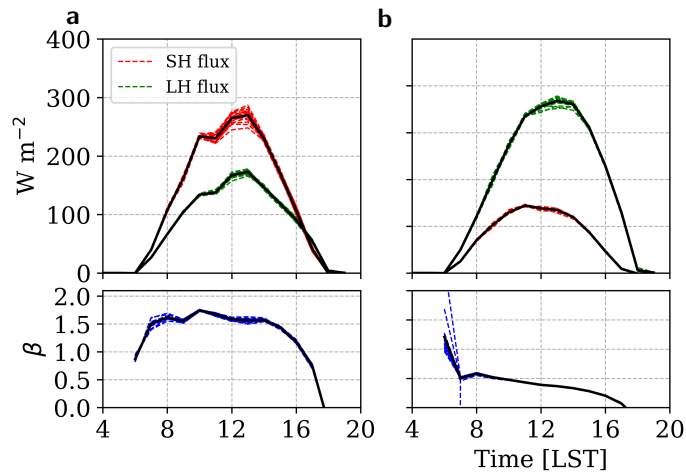

**Figure S3. Example of the diurnal cycle of surface heat fluxes for the HE1 simulation.** Patched averaged sensible (red dashed) and latent heat flux (green dashed) in  $\text{W m}^{-2}$  shown in the top panels for **a**, dry patches and **b**, wet patches. Bowen ratio ( $\beta$ ) is shown in the bottom panel. Black lines indicate the average value across all patches.

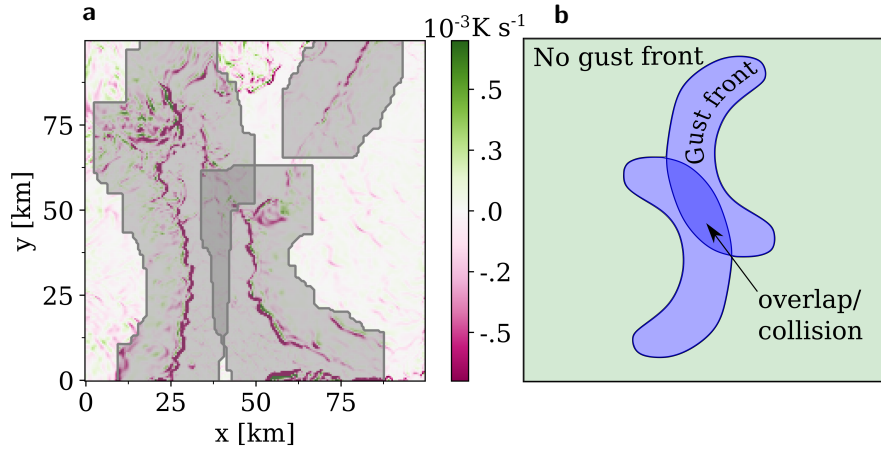

**Figure S4.** **a**, Snapshot of horizontal advection of surface virtual temperature (shading,  $\text{K s}^{-1}$ ) at 18:15 LST. Gust front boundaries are shown in light grey shading, with overlap in darker grey shading. Saturated magenta regions correspond to gust fronts associated with cold pools. **b**, Schematic illustration showing the grid classification into gust front objects, collision objects where gusts overlap, and no gust front.

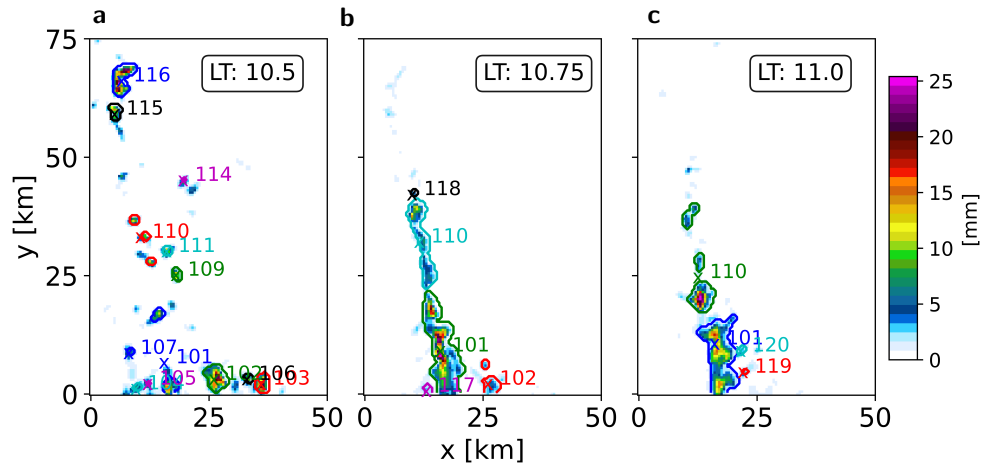

**Figure S5.** Example of merging and splitting cells in the HE0.5 WRF simulation. Shows 15-minute accumulated precipitation (shaded; mm) with contours denoting storm objects identified by the storm tracking procedure at **a**, 10.25 LT, **b**, 10.5 LT and **c**, 11 LT. 'x' denotes the centroid of the identified storm objects and numbers denote their unique identifiers.

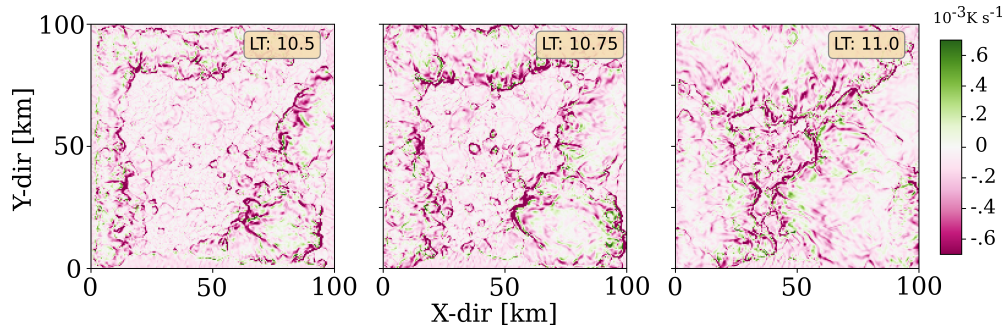

**Figure S6.** Snapshots of WRF horizontal advection of surface virtual temperature (shading,  $\text{K s}^{-1}$ ) at 10:30, 10:45 and 11:00 LST. Saturated magenta regions correspond to gust fronts associated with cold pools.

Figure S6 shows a top down view of CP gust fronts (saturated magenta regions in arc shapes) triggered by thunderstorms along the edge of a dry SM moisture patch at 10:30 LT in the HE1 simulation. By 10:45 the CPs coalesce to form larger, more organized fronts, moving preferentially toward the centre of the dry patch in the direction of the convex side the arc, where they converge by 11:00 LT.

To elaborate more on the previous figure, figure S7 showcases the vertical profile along the zonal direction at  $y = 50\text{km}$  of modelled processes that are key to understanding the enhancement of thunderstorms over significant LULLC regions. At 10:00 LT a 2K temperature difference develops between the wet and dry SM patches (see green dashed curves in the bottom panels; Fig. S7a and b). This temperature differential is responsible for the shallow circulation, below 1.5km height, that develops along the boundary of the wet/dry SM patches, seen by the black contours on the vertical dashed line. Wind is moving from the wet to dry SM patch at a maximum velocity of approximately  $2 \text{ m s}^{-1}$  near the surface on the dry side of the patch (Fig. S7a and b). Figure S7b also shows cooler air (and moist - not shown) advected into the dry patch, associated with the thermal circulation. The circulation is also present on the opposing side of the dry patch near  $x = 100\text{km}$ .

Water mixing ratio indicates moist convective cell initiation across the dry patch, with more organized thunderstorms triggered at the breeze fronts (Fig. S7a). [19] showed that in such a scenario, CP outflow from thunderstorms merges with the breeze front, resulting in the front to accelerate in the direction of the warmer air. The result of this processes is shown in figure S7c and d, where opposing circulations associated with cooler air converges near the center of the patch, from which a large thunderstorm complex emerges (Fig. S7c).

It is also important to note that there is no outflow that similarly moves into the wet patch, indicating that the thermal breeze, and thus land surface, imposes a preferred direction of movement for the convective CP outflow. Later during the day, although not shown, large organized convective CPs generated from the thunderstorm complex over the centre of the dry patch does eventually migrate into the wet patches. These CP's occasionally collide over the wet patches, triggering thunderstorms that are distinctly organized in patterns that depend on the location of the dry boxes the CP's migrate from.



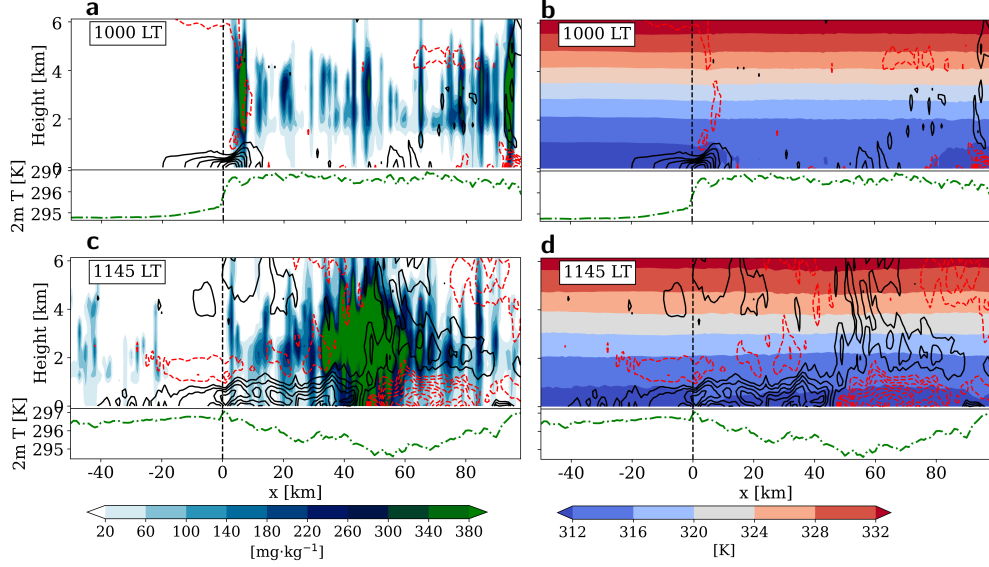

**Figure S7.** Vertical cross sections averaged across all dry and wet SM patch pairs for the HE1 simulation of **a**, 10:00 LST zonal wind component (increments of  $0.2 \text{ m s}^{-1}$ ; top panel) contoured (black for positive, red for negative), water mixing ratio ( $\text{mg kg}^{-1}$ ; shaded) and 2m temperature (K; bottom panel), **b**, same as **a** but with potential temperature (K) shaded. **c**, Same as **a** but at 11:45 LST and **d**, same as **b** but at 11:45 LST. The wet (dry) patch is located to the left (right) of the vertical dashed line at  $x = 0$ .

751 Precipitation initiates along the edges and corners of the dry SM patches (Fig. S8a—  
 752 c panels 1 and 2) and, as one would expect, the contribution to the total rainfall at this  
 753 time is dominated by triggers outside of gust front and CP collisions (green dotted line).  
 754 However, toward the centre of the dry patch (30 to 50 km into the patch) in the HE2  
 755 simulation, rainfall is dominated by thunderstorms triggered from gust fronts (red dashed  
 756 line in Fig. S8c panel 3). This is in contrast to the HE05 and HE1 simulation where the  
 757 time series for this region show that the peak in precipitation coincides with CP collision  
 758 triggered thunderstorms (blue lines, panel 3 Fig. S8a and b) as the primary source of  
 759 precipitation, followed closely by gust front triggered precipitation (red dashed lines). It is  
 760 also interesting to note that the second peak in precipitation in the centre of the HE05  
 761 patch (panel 3), which is not present in the HE1 or HE2 simulation, occurs at the same  
 762 time when there is a sharp increase in CP collision derived precipitation, such that the  
 763 precipitation contribution from CP collision triggered thunderstorms are close to 100%.

764 In figure S9 at the time of the first detected storms ( $t=0$ ), taken from 3 days of  
 765 the HE1 simulation, mean of the maximum vertical velocity at 1km model height is at  
 766 a minimum. This minimum is due to criteria for detecting storms that are based on  
 767 a precipitation threshold criteria, resulting in downdrafts detected at  $t=0$ . In all three  
 768 simulations the minimum is consistent at about  $1.5 \text{ m s}^{-1}$ . All three simulations exhibit a  
 769 jump in updraft velocity 30 to 45 minutes prior to the detection of the storms when the

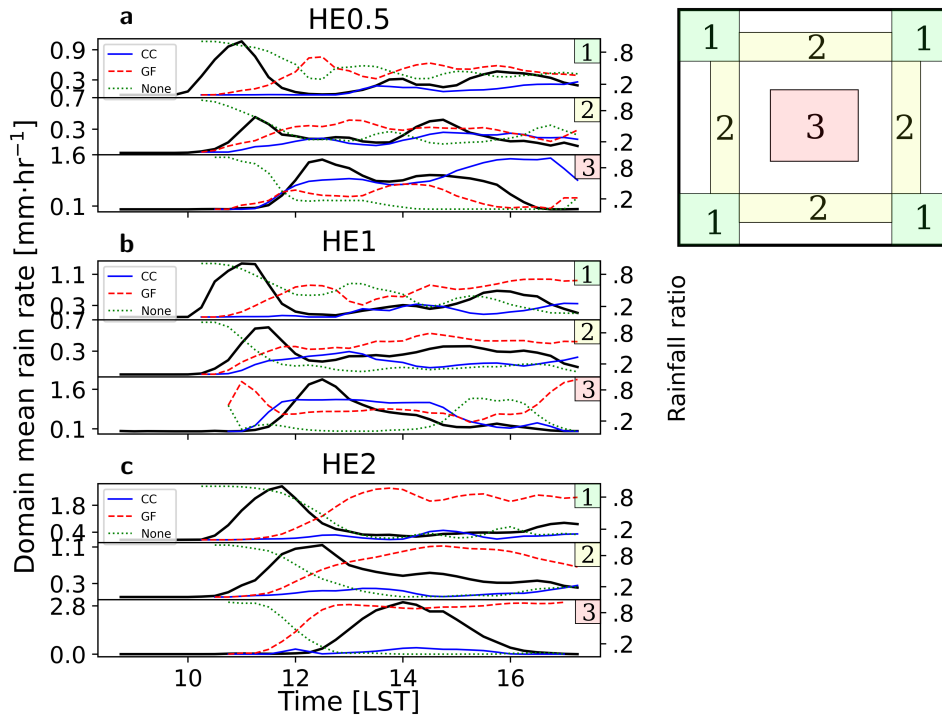

**Figure S8.** Time series of domain average rain rate (mm hr<sup>-1</sup>; black line) and the respective contribution, as a ratio, to the total hourly rain by thunderstorms triggered by isolated gust fronts (red dash), colliding CPs (blue solid) and neither (green dotted). Rain rates are averaged over the domains demarcated in the top right panel by 1 = corners, 2 = sides and 3 = centre.

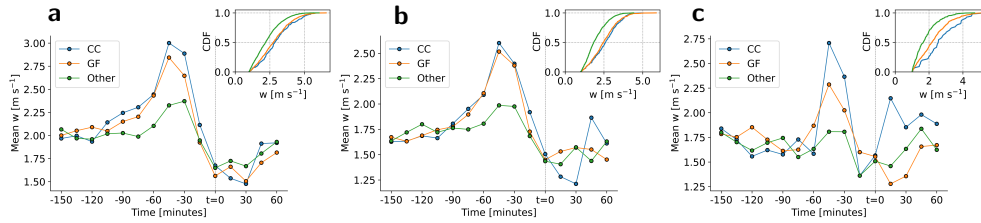

**Figure S9.** Time series of WRF simulation mean of maximum vertical velocity ( $w$ ; m s<sup>-1</sup>) at 1km height in a 1x1 grid point box around the centroid of initial storm object locations for **a**, HE05 simulation; blue curves denote CP collision triggered storms, red gust front triggered and green other. Grey vertical line denotes the time of initiation at  $t=0$ . Top right panel is the probability density function of max.  $w$  ( $\geq 1$  m s<sup>-1</sup>) at the time of peak max.  $w$ . **b**, same as **a** but for the HE1 simulation and **c**, same as **a** but HE2.

770 storms initiate. While the updrafts from the CP collision and gust front triggered storms  
 771 (blue and red curves) are stronger by  $0.5$  to  $0.8\text{ m s}^{-1}$  relative to the other storms (for  
 772 all three simulations), the overall updraft speed is strongest in the HE05 simulation. The  
 773 HE1 storms has about  $1\text{ m s}^{-1}$  weaker maximum updraft velocity compared to H05 storms,  
 774 and the HE2 storms an average updraft velocity weaker by a factor of two compared to  
 775 the H05 storms. This explains to a large degree why storms produce higher extreme (99th  
 776 percentile) rainfall amounts, and larger storms at the extreme ends, in the HE05 and HE1  
 777 simulation compared to the HE2 simulation (see Fig. 6).

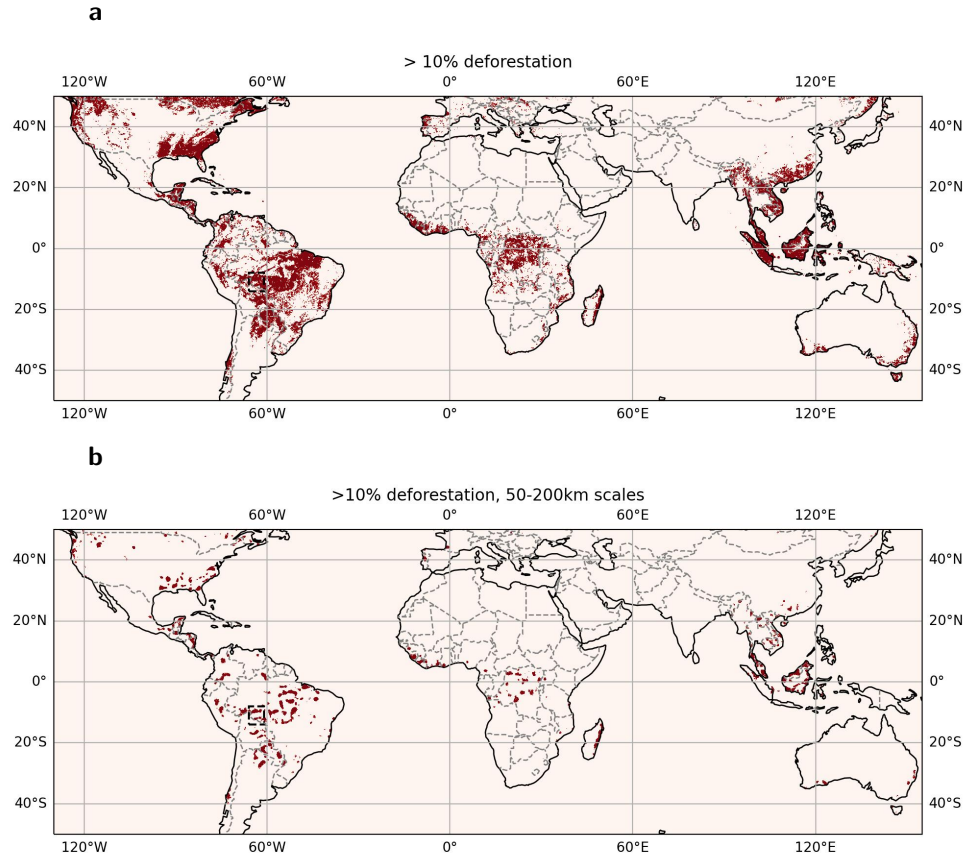

**Figure S10. Areas across the globe within potentially similar convective organization extremes.** HANSEN deforestation dataset re-gridded to 0.05 degrees, showing pixels with **a**  $\geq 10\%$  deforestation since the year 2000 (considers change 2000-2022) and **b**, same as **a** but for  $\geq 10\%$  deforestation scales of between 50-200km<sup>2</sup>
